# Supplementary material for: Carotenoid Biosynthetic Genes in Cabbage: Genome-Wide Identification, Evolution, and Expression Analysis
Source: MDPI journal article supplement (doi:10.3390/genes12122027), 2021-12-20
Supplement: s1 [file s1]

**Table S2.** The accession No. of amino acid sequences of *PSY* in 23 kinds of plants

| Plant Species  | The Latin name                 | Amino NO.    |
|----------------|--------------------------------|--------------|
| Tomato         | <i>Solanum lycopersicum</i>    | ACE75885.1   |
| Chilli         | <i>Capsicum annuum</i>         | ACE78189.1   |
| Medlar         | <i>Lycium barbarum</i>         | AAW88383.1   |
| Sweet potato   | <i>Ipomoea batatas</i>         | BAI47572.1   |
| Cape jasmine   | <i>Gardenia jasminoides</i>    | AEF59491.1   |
| Osmanthus      | <i>Osmanthus fragrans</i>      | AFK66771.1   |
| Agastache      | <i>Pogostemon cablin</i>       | AHJ90431.1   |
| Persimmon      | <i>Diospyros kaki</i>          | ACM44688.1   |
| Kiwifruit      | <i>Actinidia deliciosa</i>     | ACO53104.1   |
| Watermelon     | <i>Citrullus lanatus</i>       | AGT57744.1   |
| Pumpkin        | <i>Cucurbita moschata</i>      | AEK86564.1   |
| Papaya         | <i>Carica papaya</i>           | ABG72805.1   |
| Arabidopsis    | <i>Arabidopsis thaliana</i>    | AED92401.1   |
| Narcissus      | <i>Narcissus tazetta</i>       | ABI98829.1   |
| Lilium brownii | <i>Lilium lancifolium</i>      | ADW08475.1   |
| Alfalfa        | <i>Medicago sativa</i>         | AIT98180.1   |
| Carrot         | <i>Daucus carota</i>           | Q9SSU8.1     |
| Strawberry     | <i>Fragaria × ananassa</i>     | AC R 61392.1 |
| Apple          | <i>Malus domestica</i>         | AKU36798.1   |
| Rice           | <i>Oryza sativa Indica</i>     | AAS18307.1   |
| Maize          | <i>Zea mays</i>                | AAX13806.1   |
| Sorghum        | <i>Sorghum bicolor</i>         | AAW28996.1   |
| Haematococcus  | <i>Haematococcus lacustris</i> | AAY53806.1   |
