# Supplementary material for: Carotenoid Biosynthetic Genes in Cabbage: Genome-Wide Identification, Evolution, and Expression Analysis
Source: MDPI journal article supplement (doi:10.3390/genes12122027), 2021-12-20
Supplement: s1 [file s1]

**Table S1.** The primer sequences information used in this study

| Primer name | Forward (5'-3')             | Reverse (5'-3')             |
|-------------|-----------------------------|-----------------------------|
| qP-Actin    | CCAGAGGTCTTGTTCAGCCATC      | GTTCCACCACTGAGCACAATGTTAC   |
| qP-BoPSY.1  | TCCTCTCTAATGAGCTACAGAAGGA   | ATCGATGCCAGGAGAAGTAGACCTG   |
| qP-BoPDS.1  | TTGAAGAATGGATGAGAAAGCAGGG   | CATCTTCGAACCATGTTTCTCCTGA   |
| qP-BoZDS    | TTTAACGCCAGGAGATCCCTAC      | TATGAACCAGCGAGGAAGAAGT      |
| qP-BoLYC    | AAACTCATTTGGCCTAACAACTAC    | CAGTGACTTTAGCCTGATGGAAT     |
|             | CGATCGTCTCACAACATGTCTTCTGT  | CGATGGTCTCACTCTGAGTATGTTGG  |
| PSY1-1      | AGCAGTGTTATGGGTTGCTTCCTCTTC | TAAGCTGATTGGCTATACCGAGAGC   |
|             | TCCTAA                      | CAAGGCAG                    |
|             | CGATCGTCTCAAGAGACGTTGGCGA   | CAGTCGTCTCATACAAGTTGTTTCCTC |
| PSY1-2      | AGATGCGAGAAGAGGAAGAGTTTAT   | TTGAACTTGGAGTCTTTAGTACTGAT  |
|             | CTGCCCCAA                   | TTAGCAT                     |
|             | CGATCGTCTCACAACATGTCTTCTGT  | CAGTCGTCTCATACTTAACTTGAAA   |
| PSY2        | AGCAGTGTTATGGGTTGCTGCTTCTTC | CCTTTACTACTGATTTAGCATAAGCT  |
|             | TCCAA                       | AATGGAAGAG                  |
|             | CGATCGTCTCACAACATGTCTTCTGT  | CAGTCGTCTCATACTCATCTTGAAC   |
| PSY3        | AGCAGTGTTATGGGTTGCTCCCTCTTC | TGAAGCCTTTAGTATTGATTTAGCAT  |
|             | TCCAA                       | AAGCTAATG                   |
